# Supplementary material for: Frequency, genetic mechanisms and factors associated with pre-extensively drug-resistant tuberculosis in Northern Nigeria
Source: Research Square preprint supplement (doi:10.21203/rs.3.rs-8539120/v1), 2026-02-13
Supplement: Supplementary file 1 [file 48ffec38870ca1d0d8481579.pdf]

**Research Topic:** Frequency, genetic mechanisms and factors associated with pre-extensively drug-resistant tuberculosis in Northern Nigeria

**Instruction:** Please tick as appropriate and provide answers where necessary.

**Personal Data**

1. Age .....
2. Gender: Male [ ] Female [ ]
3. Marital Status: Single [ ] married [ ] widow [ ]
4. Type of sample: urine [ ] sputum [ ] others [ ].
5. Educational Status: None [ ] Primary [ ] Secondary [ ] Tertiary [ ]
6. Type of Occupation: Farming [ ] Civil Servant [ ] Self Employed [ ] Others [ ]
7. Type of residence: Urban [ ] Rural [ ]
8. State of Origin/Resident.....
9. Have you ever have TB before? Yes [ ] No [ ] Can't remember [ ]
10. Have you ever taken TB treatment? Yes [ ] NO [ ]
11. HIV status Positive [ ] Negative [ ] Unknown [ ]
12. Have you smoke cigarette in your life time? Yes [ ] No [ ]
13. Have you drink alcohol in your life time? Yes [ ] No [ ].
14. Have you being diagnosed with Diabetes? Yes [ ] No [ ].
15. Do you have TB patient in your family? Yes [ ] No [ ].
16. Patient TB category New case [ ] DR suspect [ ]
17. Site of TB disease Pulmonary [ ] Extra-pulmonary [ ]
